# Supplementary material for: A Socio-Ecological Approach to Understanding How Land Use Challenges Human-Elephant Coexistence in Northern Tanzania
Source: MDPI journal article supplement (doi:10.3390/d14070513), 2022-06-24
Supplement: s1 [file s1]

## **Supplementary: Questionnaire for local respondents**

### **A. PERSONAL INFORMATION**

**1. Age**

- ☐ 25-35 ( )
- ☐ 36-46 ( )
- ☐ 47-57 ( )
- ☐ above 57

**2. Sex:**

- ☐ Male ( )
- ☐ Female ( )

**3. Education Level**

- ☐ Informal education ( )
- ☐ Primary education ( )
- ☐ Secondary education ( )
- ☐ College / technical education ( )
- ☐ University education ( )

**4. Are you a resident of this village?**

- ☐ Yes ( )
- ☐ No ( )

**5. If yes how long have lived in this village**

- ☐ 1-5 ( )
- ☐ 6-10 ( )
- ☐ 11-15 ( )
- ☐ iv) Above 15

**6. What are the main sources of your income? (Preferences)**

- ☐ Employed ( )
- ☐ Agriculture ( )

- Business ( )
- Others ( )

## **B. HUMAN-ELEPHANTS CONFLICTS (HEC) OCCURRENCES**

**1.** Have you ever encountered with elephants in your area or village?

- Yes ( )
- No ( )

**2.** How often do they visit?

- Daily Once a week ( )
- Twice a week ( )
- Any time ( )

**3.** Which time of the day?

- Day time ( )
- At night ( )
- Any time ( )

**4.** What season of the year?

- Wet ( )
- Dry ( )

**5.** If yes, what is his / their roles or duties?

- i. ....
- ii. ....
- iii. ....

**6.** What is your opinion on the presence or absence of game officers at your village?

**7.**

.....

## C. CROP RAIDS

|                 |                  |                                                                                |                        |                 |                                          |                                                                       | Circle 'a' or 'b'                                                                                   | Put ✕ - if the method failed<br>Tick ✓ - if the method succeeded<br>Put ✕✕- if the method was not used                                                             |
|-----------------|------------------|--------------------------------------------------------------------------------|------------------------|-----------------|------------------------------------------|-----------------------------------------------------------------------|-----------------------------------------------------------------------------------------------------|--------------------------------------------------------------------------------------------------------------------------------------------------------------------|
| Time of<br>raid | Incident<br>(GPS | Wildl<br>i<br>f<br>e<br><br>a<br>n<br>i<br>m<br>a<br>l<br><br>s<br>p<br>e<br>c | No. of<br>Elepha<br>nt | crop<br>damaged | Size<br>of<br>plot<br>damaged<br>(Acres) | Other damage<br>(E.g., House,<br>food store,<br>other<br>properties.) | Timing of response<br><br>a. Prevented<br>before raid<br><br>b. Chase away<br>while crop<br>raiding | Prevention Methods - used<br><br>1. Torch<br>2. Torch & Horn<br>3. Torch, Horn and Chili-crackers<br>4. Torch, horn, Chili and<br>Flashflash<br>5. Other (explain) |

|  |          | i<br>e |  |  |  |  |            |                                                                                                                                                                                                                                                                                                                                                                                                                                                                     |
|--|----------|--------|--|--|--|--|------------|---------------------------------------------------------------------------------------------------------------------------------------------------------------------------------------------------------------------------------------------------------------------------------------------------------------------------------------------------------------------------------------------------------------------------------------------------------------------|
|  | X:<br>Y: |        |  |  |  |  | a<br><br>b |  1.<br> 2.<br> 3.<br> 4.<br> 5.      |
|  | X:<br>Y: |        |  |  |  |  | a<br><br>b |  1.<br> 2.<br> 3.<br> 4.<br> 5.      |
|  | X:<br>Y: |        |  |  |  |  | a<br><br>b |  1.<br> 2.<br> 3.<br> 4.<br> 5. |
|  | X:<br>Y: |        |  |  |  |  | a          |  1.<br> 2.<br> 3.<br> 4.                                                                                        |
